# Supplementary material
Source: publisher figshare collection journal article supplement (https://acs.figshare.com/ndownloader/files/4205716)
Supplement: Supplementary file 1 [file 4205716]

## Supporting Information

### Structure of the stapled p53 peptide bound to Mdm2

Sohee Baek,<sup>†,§</sup> Peter S. Kutchukian,<sup>‡</sup> Gregory L. Verdine,<sup>‡</sup> Robert Huber,<sup>†,||,\*\*, ††</sup> Tad A. Holak,<sup>†, §§</sup> Ki Won Lee,<sup>§</sup> and Grzegorz M. Popowicz<sup>\*,†</sup>

<sup>†</sup> Max Planck Institute for Biochemistry, Am Klopferspitz 18, 82152 Martinsried, Germany

<sup>‡</sup> Department of Chemistry and Chemical Biology, Harvard University, Cambridge MA 02138, United States

<sup>||</sup> Department of Chemistry, Technical University of Munich, Lichtenbergstraße 4, 85748 Garching, Germany

<sup>\*\*</sup> School of Biosciences, Cardiff University, Cardiff CF10 3US, Wales, U.K.

<sup>††</sup> Center for Medical Biotechnology, University of Duisburg-Essen, 45117 Essen, Germany

<sup>§</sup> Department of Agricultural Biotechnology, Seoul National University, Seoul 151-921, Republic of Korea

<sup>§§</sup> Faculty of Chemistry, Jagiellonian University, Ingardena 3, 30-060 Cracow, Poland

#### Peptide synthesis

SAH-p53-8 was synthesized as previously described.<sup>1</sup>

#### Protein expression and purification

The recombinant human Mdm2 (residues 25-111) was cloned into the pET-20 vector (Novagen) without an affinity tag and expressed in *E. coli* BL21-CodonPlus(DE3)-RIL expression cells (Stratagene). Cells were grown at 37 °C and induced at OD<sub>600nm</sub> of 0.8 with 1 mM IPTG. After 5 h induction at 37 °C the cells were harvested by centrifugation. The harvested cells from 5 liters of *E. coli* cell culture were re-suspended in PBS at pH 7.4 and ruptured by sonication. After centrifugation the inclusion bodies were washed with PBS containing 0.05% Triton X-100 with subsequent low-speed centrifugation (12000G). The procedure was repeated three times. The inclusion bodies were solubilized with 6 M GuHCl in 100 mM Tris-HCl, pH 8.0 including 1 mM EDTA and 10 mM DTT. The protein was dialyzed at 4 °C, against 4 M GuHCl, pH 3.5 including 10 mM DTT. For renaturation, the protein was diluted 1:100 in 10 mM Tris- HCl, pH 7.0, containing 1 mM EDTA and 10 mM DTT by adding the denatured protein drop-wise into the refolding buffer. Refolding was carried out

for 10 h at 4 °C. Ammonium sulfate was added to a final concentration of 1.5M and the protein was applied to the Butyl Sepharose 4 Fast Flow (GE Healthcare) and subsequently eluted with 100 mM Tris-HCl, pH 7.2, including 5 mM DTT. The protein was further purified by gel filtration on HiLoad 16/60 Superdex200 (Pharmacia). The Mdm2 containing fractions are mixed with the 2-fold excess of the peptide and concentrated to about 10 mg/ml before the crystallization trial. The purity and folding of the protein was measured by SDS-PAGE and 1D NMR.

### **X-ray crystallography**

Crystallization of the Mdm2 with the peptide was achieved at room temperature by sitting drop vapor diffusion and the protein to crystallization solution ratio of 1:1, with the crystallization solution containing 100 mM Sodium acetate trihydrate, pH 4.75 and 2.5 M NaCl. The crystals appeared in several days and grew to a final size of 0.1 mm. They were transferred to cryoprotectant solution containing the crystallization solution supplemented with 25% (v/v) glycerol, then directly plunged frozen in liquid nitrogen. Native dataset to 2.0 Å were collected from a single crystal at 100 K on the SLS PXII beam line at Paul Scherrer Institute, Villigen, Switzerland and processed using XDS and XSCALE<sup>2</sup> program. The structure of Mdm2 from PDB entry 1YCR was used as a search model after the p53 peptide was removed. The initial Rfactor of the solution was 0.45. The model was subsequently rebuilt using Xfit<sup>3</sup> and refined using Refmac5 from CCP4 suite<sup>4</sup>. Data collection and refinement statistics are given in table S1. Each asymmetric unit contains two stapled peptide – Mdm2 complexes. Both are virtually identical (RMSD of the main chain atoms 0.7 Å) except region between Asp84-Val88 in chain A that is shifted by about 1.2 Å due to crystal contacts. The residues outside 18-27 range in the peptide are generally not visible in electron density (one chain shows additionally Gln28-Asn30 stabilized due

to crystal contacts) indicating that this part is flexible and do not take direct part in binding to Mdm2. Several solvent-exposed sidechains had no interpretable electron density and were removed from the model.

**Table S1.** Data collection and refinement statistics

|                               |                                                      |
|-------------------------------|------------------------------------------------------|
| Data collection               |                                                      |
| Space group                   | P2 <sub>1</sub>                                      |
| Cell constants (Å)            | a = 45.4<br>b = 42.41<br>c = 50.5<br>$\beta$ = 90.86 |
| Resolution range (Å)          | 50 – 2.0                                             |
| Wavelength (Å)                | 0.999                                                |
| Observed reflections          | 48 879                                               |
| Unique reflections            | 13 254                                               |
| <i>Whole range</i>            |                                                      |
| Completeness (%)              | 99.5                                                 |
| $R_{\text{merge}}$            | 13.6                                                 |
| $I/\sigma(I)$                 | 12.45                                                |
| <i>Last shell</i>             |                                                      |
| Resolution range (Å)          | 2.0 – 2.1                                            |
| Completeness (%)              | 99.8                                                 |
| $R_{\text{merge}}$            | 60.6                                                 |
| $I/\sigma(I)$                 | 3.14                                                 |
| Refinement                    |                                                      |
| No. of reflections            | 11 550                                               |
| Resolution (Å)                | 20 – 2.0                                             |
| R-factor (%)                  | 16.8                                                 |
| $R_{\text{free}}$ (%)         | 21.6                                                 |
| Average B (Å <sup>2</sup> )   | 13.42                                                |
| R.m.s bond length (Å)         | 0.009                                                |
| R.m.s. angles (°)             | 1.05                                                 |
| Content of asymmetric unit    |                                                      |
| No. of protein complexes      | 2                                                    |
| No. of protein residues/atoms | 197/1660                                             |
| No. of solvent atoms          | 146                                                  |

## References

- (1) Kim, Y-W.; Grossmann, T. N.; Verdine, G. L, Nat. Protocols. 2011, 6, 761-771.
- (2) Kabsch, W. *J. Appl. Cryst.* **1993**, 26, 795-800.
- (3) McRee, D.E. *J. Struc. Biol.* **1999**, 125, 156-65.
- (4) Collaborative Computational Project, Number 4. *Acta Crystallogr. D. Biol. Crystallogr.* **1994**, 50, 760-3.
